# Supplementary material for: Structural basis for PRC2 decoding of active histone methylation marks H3K36me2/3
Source: eLife journal article supplement (doi:10.7554/elife.61964), 2020-11-19
Supplement: supp [file elife_poa_e61964_Figure_1_figure_supplement_4.pdf › elife_poa_e61964_Figure_1_figure_supplement_4.pdf]

# Figure 1-figure supplement 4

**A** Front view/CXC

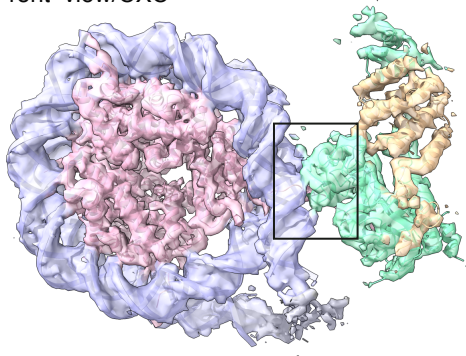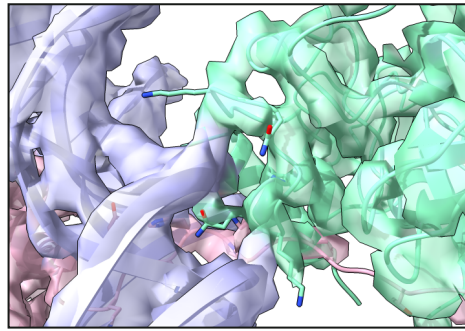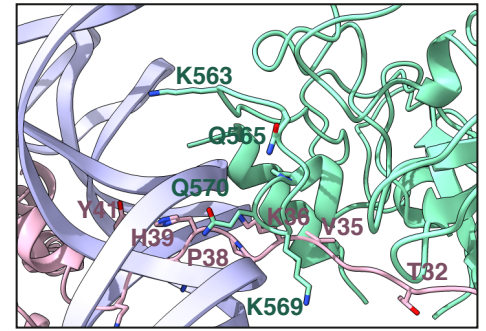

**B** Top view/Bridge Helix

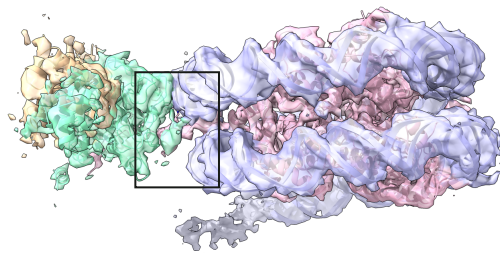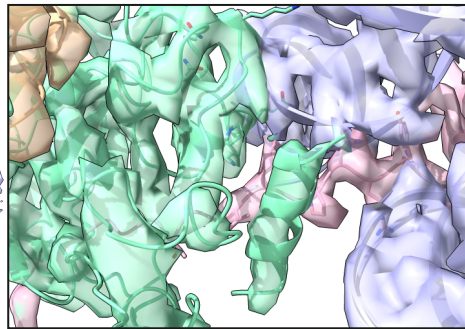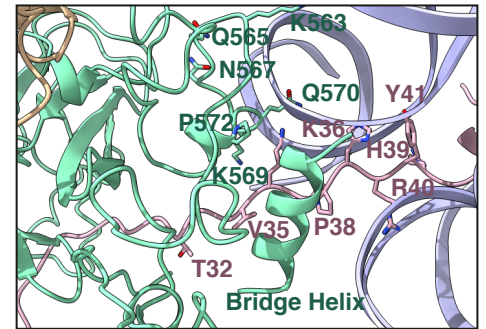

**C** Bottom view/K36 position

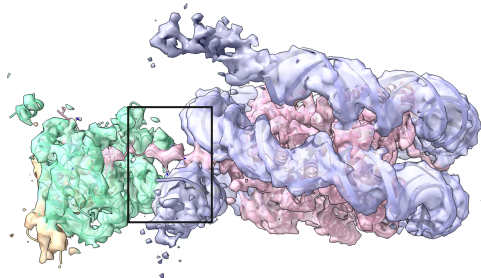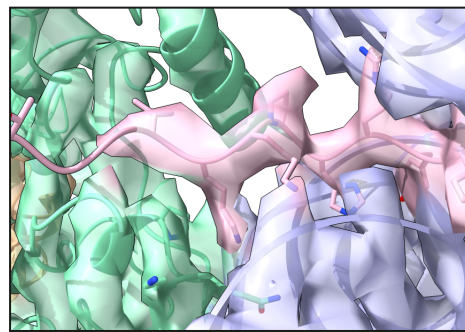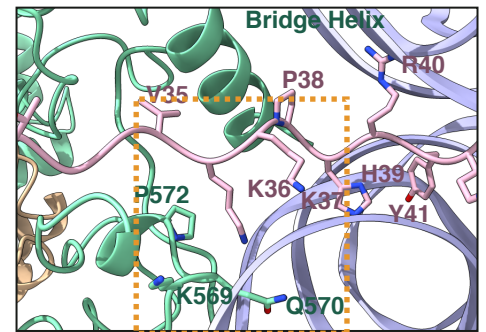

**D** Back view/Bridge helix and K36 position

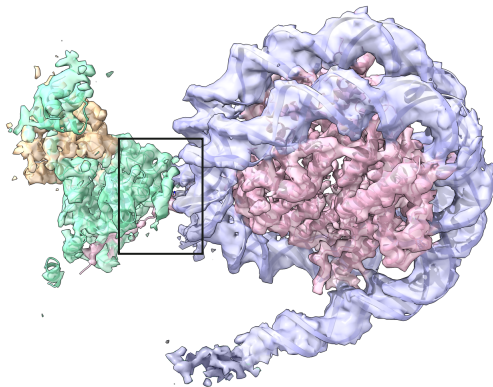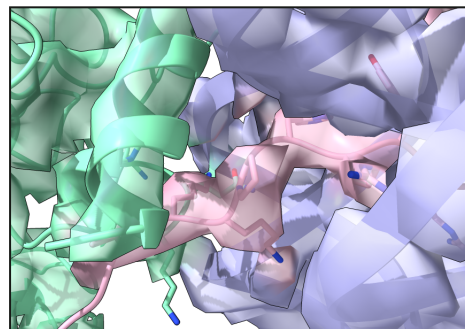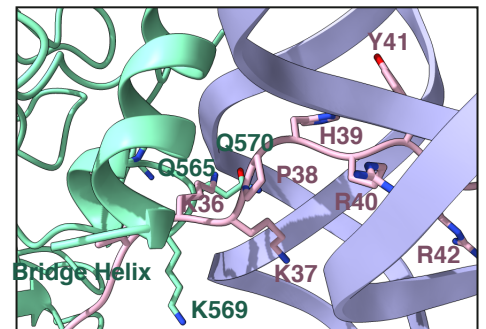

**E**

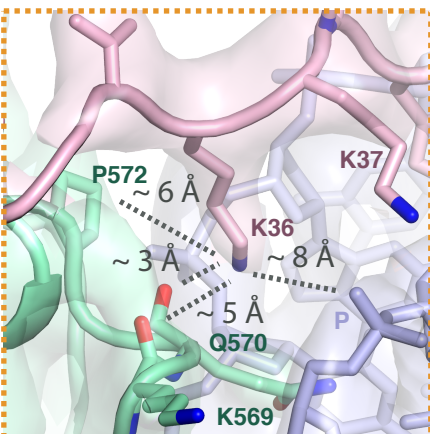

~ 180°

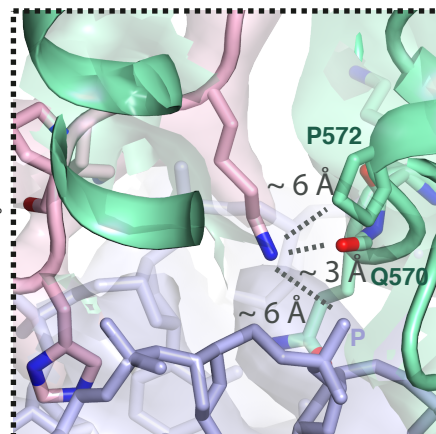

**F**

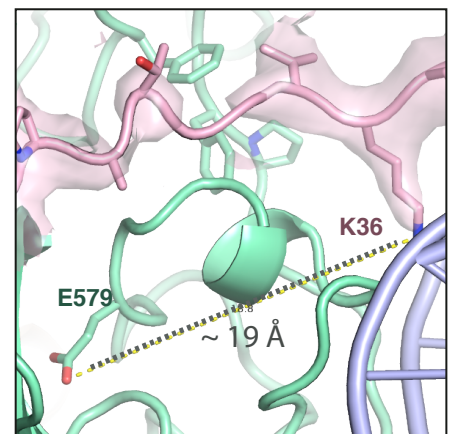

H3 tail/E579 pocket
