# Supplementary material for: Structural basis for PRC2 decoding of active histone methylation marks H3K36me2/3
Source: eLife. 2020 Nov 19;9:e61964. doi: 10.7554/eLife.61964 (PMC7725500; doi:10.7554/eLife.61964)
Supplement: Supplementary file 2. [file elife-61964-supp2.xlsx]

## Sheet: 200401_TableS2
GEO number	ChIP sample	Tissue	Wild-type ChIP/input: reference for normalization	Normalization factor	Total number of reads aligned to the dm6 genome in:				Total number of reads aligned to the dp3 genome in:
					sample (ChIP)	wild-type reference (ChIP)	sample (input)	wild-type reference (input)	sample (ChIP)	wild-type reference (ChIP)	sample (input)	wild-type reference (input)
nd	H3K36me2_Oregon-R_1	21-24 hr embryos	H3K36me2_Oregon-R_1	1	6656498	6656498	7082463	7082463	5188441	5188441	8594402	8594402
nd	H3K36me2_H3K36A_1	21-24 hr embryos	H3K36me2_Oregon-R_1	0.298198	5154270	6656498	6105114	7082463	7939120	5188441	4365594	8594402
nd	H3K36me2_Oregon-R_2	21-24 hr embryos	H3K36me2_Oregon-R_2	1	9549624	9549624	9108801	9108801	2739625	2739625	4378024	4378024
nd	H3K36me2_H3K36A_2	21-24 hr embryos	H3K36me2_Oregon-R_2	0.295194	5003115	9549624	7347054	9108801	10080205	2739625	7320861	4378024
nd	H3K27me3_Oregon-R_1	21-24 hr embryos	H3K27me3_Oregon-R_1	1	6940312	6940312	7082463	7082463	5508339	5508339	8594402	8594402
nd	H3K27me3_H3K36A_1	21-24 hr embryos	H3K27me3_Oregon-R_1	1.05122	8882459	6940312	6105114	7082463	3951825	5508339	4365594	8594402
nd	H3K27me3_Oregon-R_2	21-24 hr embryos	H3K27me3_Oregon-R_2	1	9639769	9639769	9108801	9108801	2684655	2684655	4378024	4378024
nd	H3K27me3_H3K36A_2	21-24 hr embryos	H3K27me3_Oregon-R_2	0.981695	8073026	9639769	7347054	9108801	4748032	2684655	7320861	4378024
nd	H3K36me2_wt_1	Larval tissues (3rd instar)	H3K36me2_wt_1	1	4481522	4481522	4564734	4564734	5451153	5451153	4371751	4371751
nd	H3K36me2_H3K36R_1	Larval tissues (3rd instar)	H3K36me2_wt_1	0.232332	2132807	4481522	8327873	4564734	9161302	5451153	6543733	4371751
nd	H3K36me2_wt_2	Larval tissues (3rd instar)	H3K36me2_wt_2	1	5184183	5184183	8018564	8018564	6632021	6632021	7770015	7770015
nd	H3K36me2_H3K36R_2	Larval tissues (3rd instar)	H3K36me2_wt_2	0.236646	1950927	5184183	8075085	8018564	8108045	6632021	6015632	7770015
nd	H3K27me3_wt_1	Larval tissues (3rd instar)	H3K27me3_wt_1	1	2583421	2583421	4564734	4564734	3756305	3756305	4371751	4371751
nd	H3K27me3_H3K36R_1	Larval tissues (3rd instar)	H3K27me3_wt_1	0.65794	2336413	2583421	8327873	4564734	4236239	3756305	6543733	4371751
nd	H3K27me3_wt_2	Larval tissues (3rd instar)	H3K27me3_wt_2	1	2547725	2547725	8018564	8018564	3735337	3735337	7770015	7770015
nd	H3K27me3_H3K36R_2	Larval tissues (3rd instar)	H3K27me3_wt_2	0.46556	1398674	2547725	8075085	8018564	3386309	3735337	6015632	7770015
Calculation of the normalization factors:
nb_s_dm6 = 'Total number of reads aligned to the dm6 genome in sample (ChIP)'
nb_r_dm6 = 'Total number of reads aligned to the dm6 genome in wild-type reference (ChIP)'
nb_in_s_dm6 = 'Total number of reads aligned to the dm6 genome in sample (input)'
nb_in_r_dm6 = 'Total number of reads aligned to the dm6 genome in wild-type reference (input)'
nb_s_dp3 = 'Total number of reads aligned to the dp3 genome in sample (ChIP)'
nb_r_dp3 = 'Total number of reads aligned to the dp3 genome in wild-type reference (ChIP)'
nb_in_s_dp3 = 'Total number of reads aligned to the dp3 genome in sample (input)'
nb_in_r_dp3 = 'Total number of reads aligned to the dp3 genome in wild-type reference (input)'
nb_s_dm6 x k = nb_s_dm6_NORM = 'Total number of aligned reads to the dm6 genome in sample (ChIP) after normalization'
F = 'Fold change of the proportion of dp3 reads in the input of the sample compared to the proportion of dp3 reads in the input of the wild-type reference'
F = (nb_in_s_dp3 / nb_in_s_dm6) / (nb_in_r_dp3 / nb_in_r_dm6)
F' = 'Fold change of dp3 read numbers in the wild-type reference (ChIP) compared to dp3 read numbers in the sample (ChIP)'
F' = nb_r_dp3 / nb_s_dp3 => nb_s_dp3 x F' = nb_r_dp3
After normalization, we want to have the same number of dp3 reads in a sample (ChIP) and in its reference (ChIP). Taken into account the fold change of the proportion of dp3 reads in the inputs of the sample and the reference we can write: F' = k / F => k = F' x F
Normalization factor = 'Fold change of dm6 normalized read numbers in the sample (ChIP) compared to dm6 read numbers in the reference (ChIP)'
Normalization factor = nb_s_dm6_NORM / nb_r_dm6 = k x nb_s_dm6 / nb_r_dm6 = F' x F x nb_s_dm6 / nb_r_dm6
