# Supplementary figures and images for: Structural basis for PRC2 decoding of active histone methylation marks H3K36me2/3
Source: eLife journal article supplement (doi:10.7554/elife.61964), 2020-11-19

# Figure 1-figure supplement 1

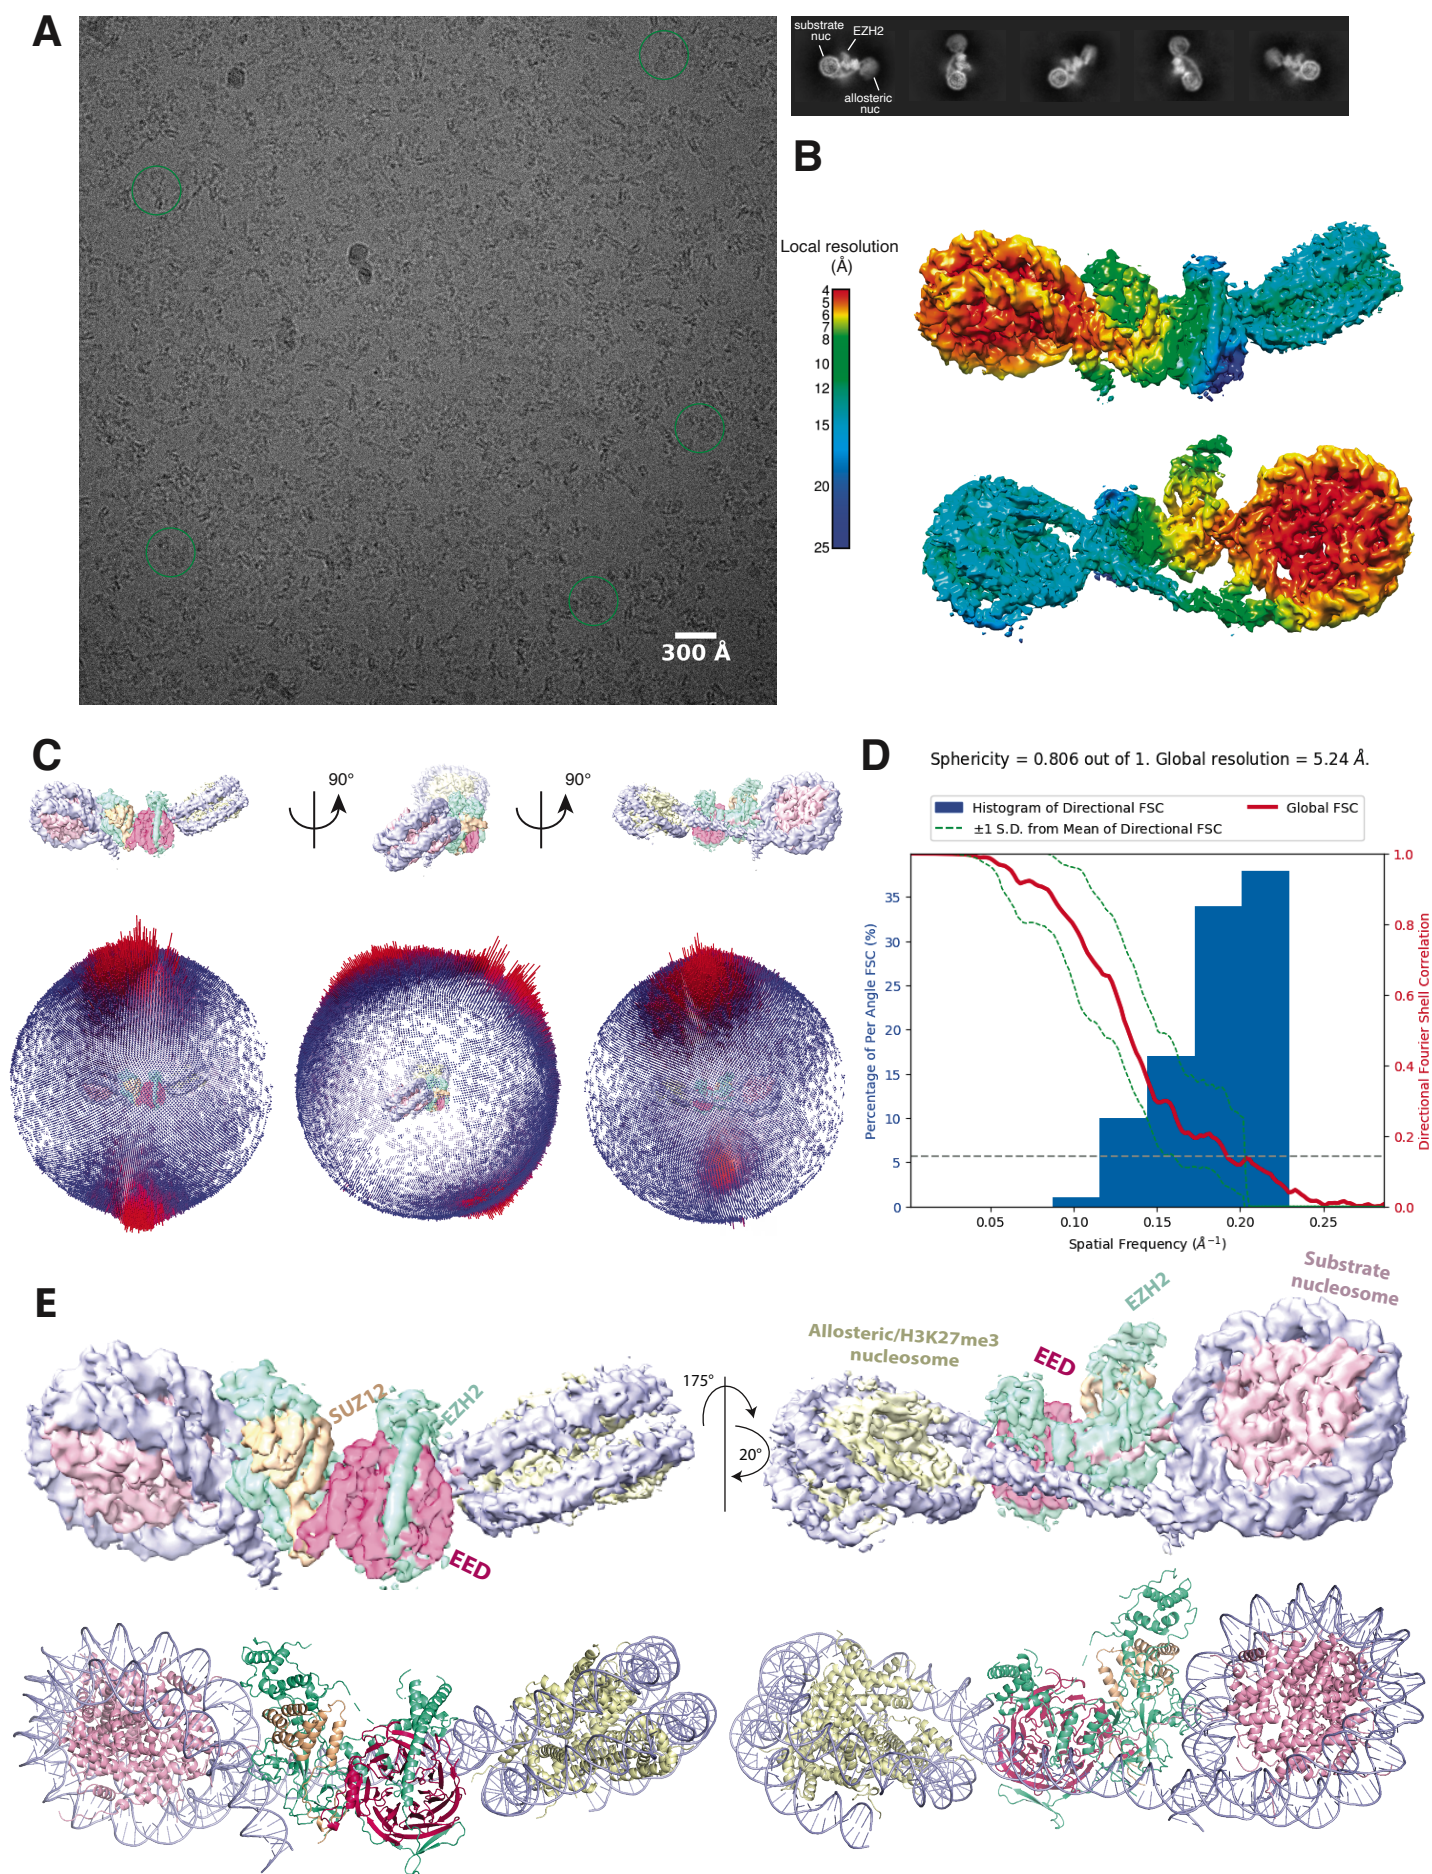

Supplement: supp [file elife_poa_e61964_Figure_1_figure_supplement_1.pdf › elife_poa_e61964_Figure_1_figure_supplement_1.pdf]

# Figure 1-figure supplement 2

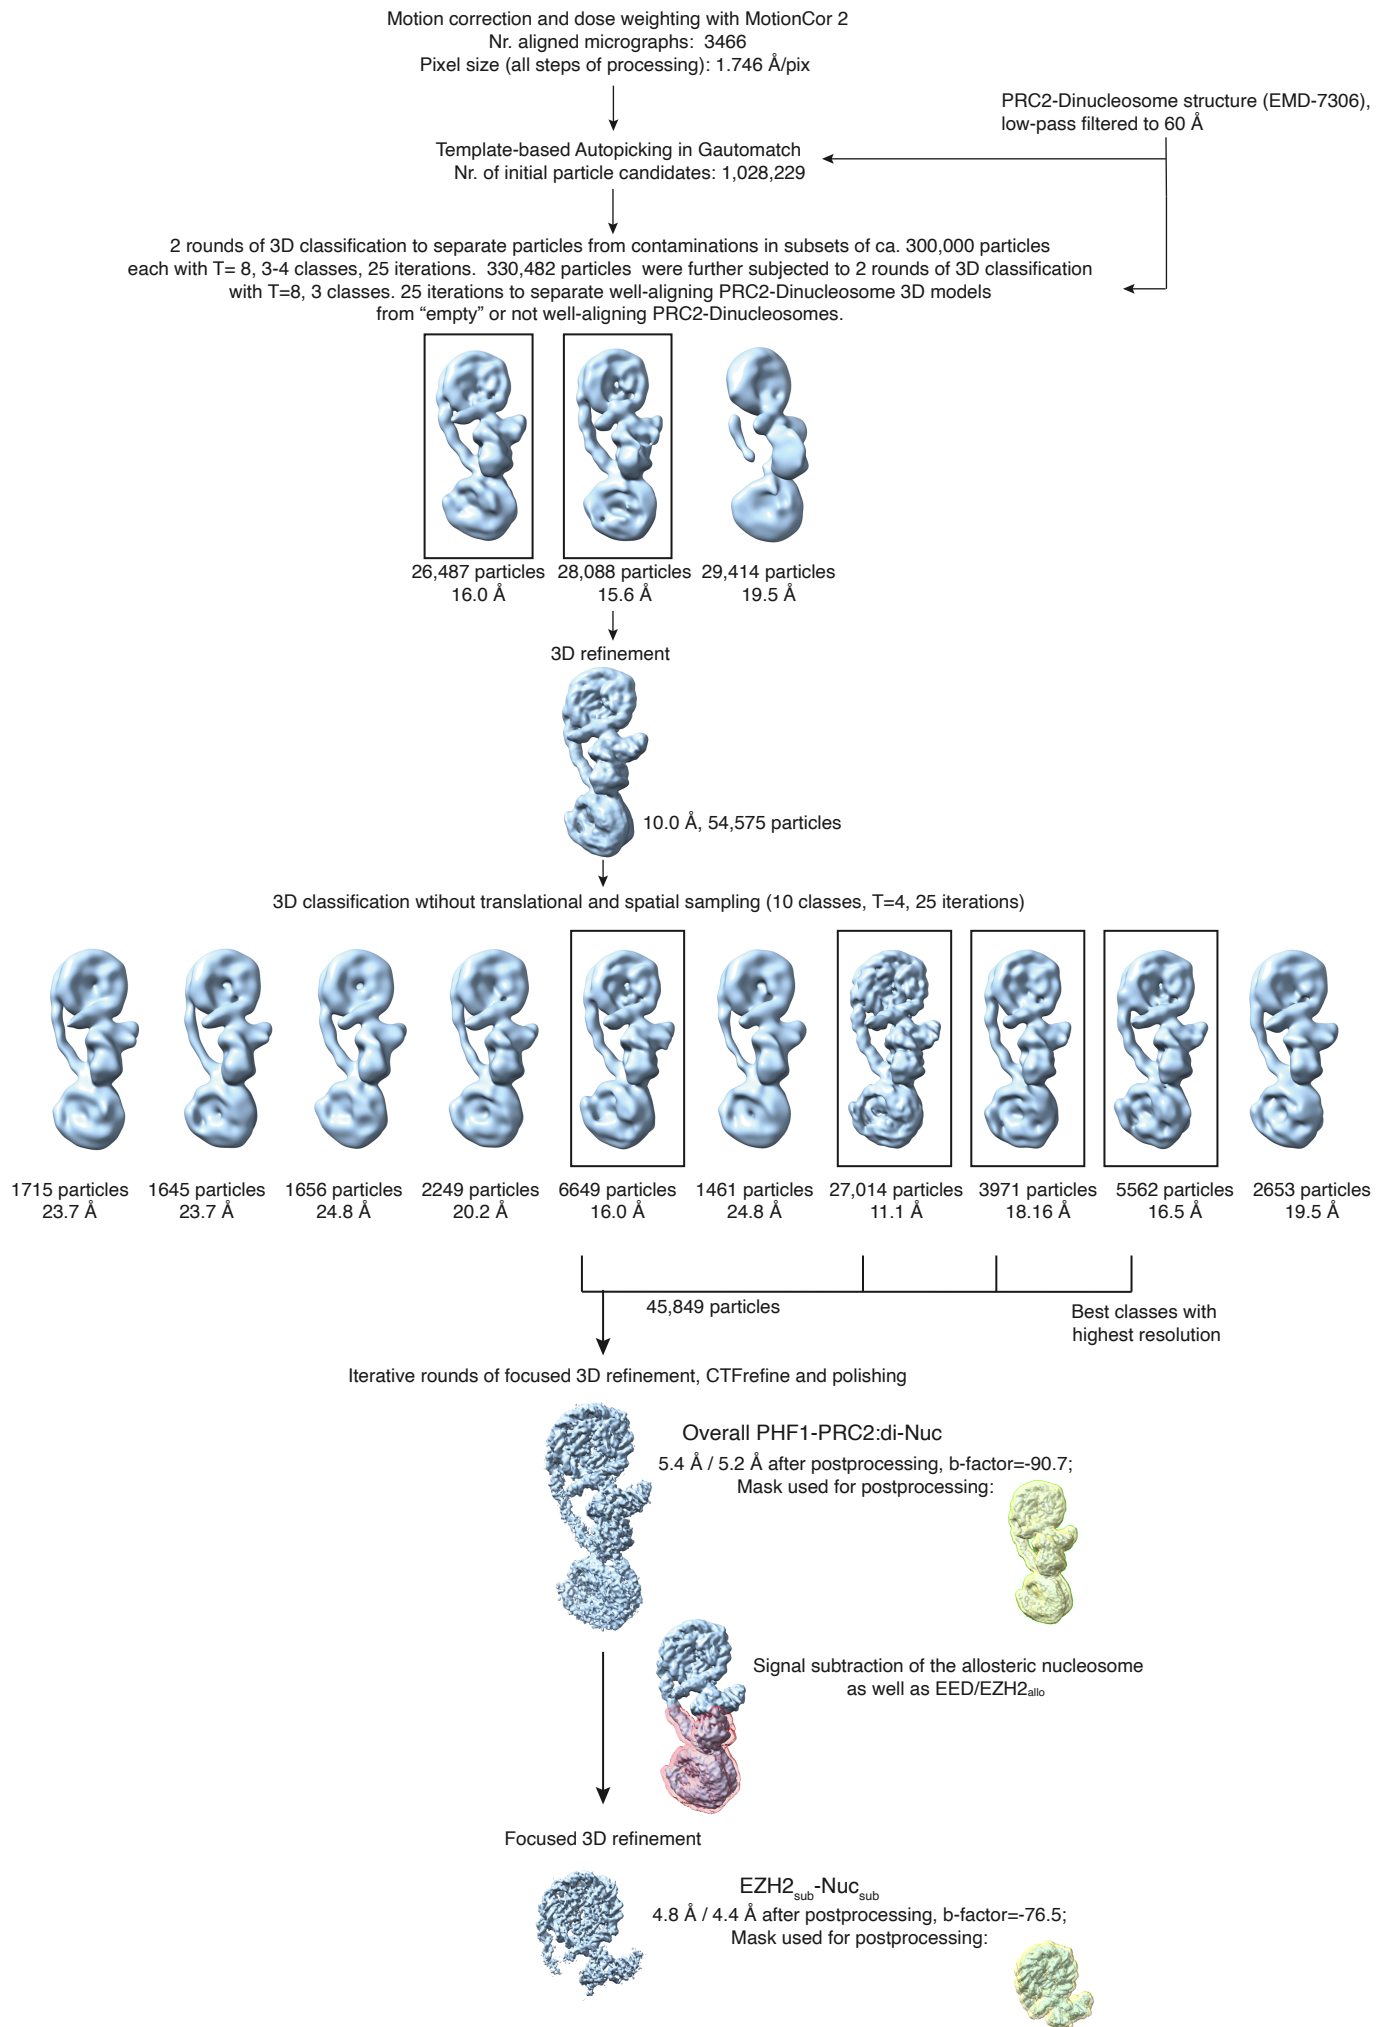

Supplement: supp [file elife_poa_e61964_Figure_1_figure_supplement_2.pdf › elife_poa_e61964_Figure_1_figure_supplement_2.pdf]

# Figure 1-figure supplement 3

**A**

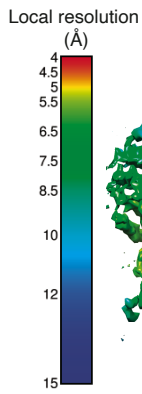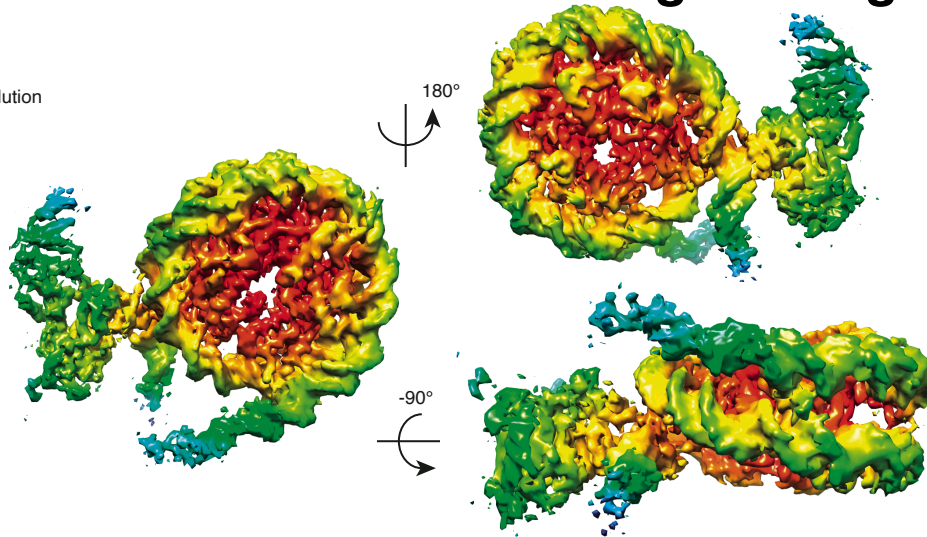

**B**

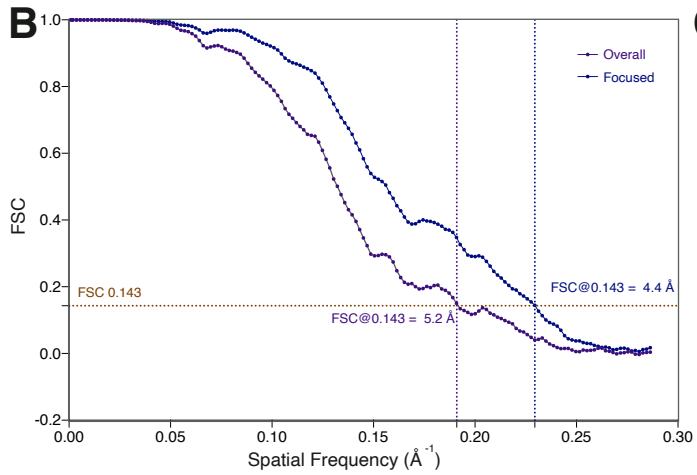

**C**

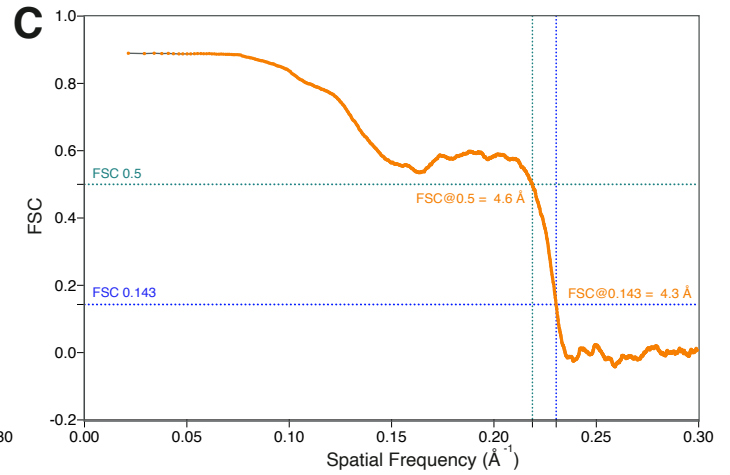

**D**

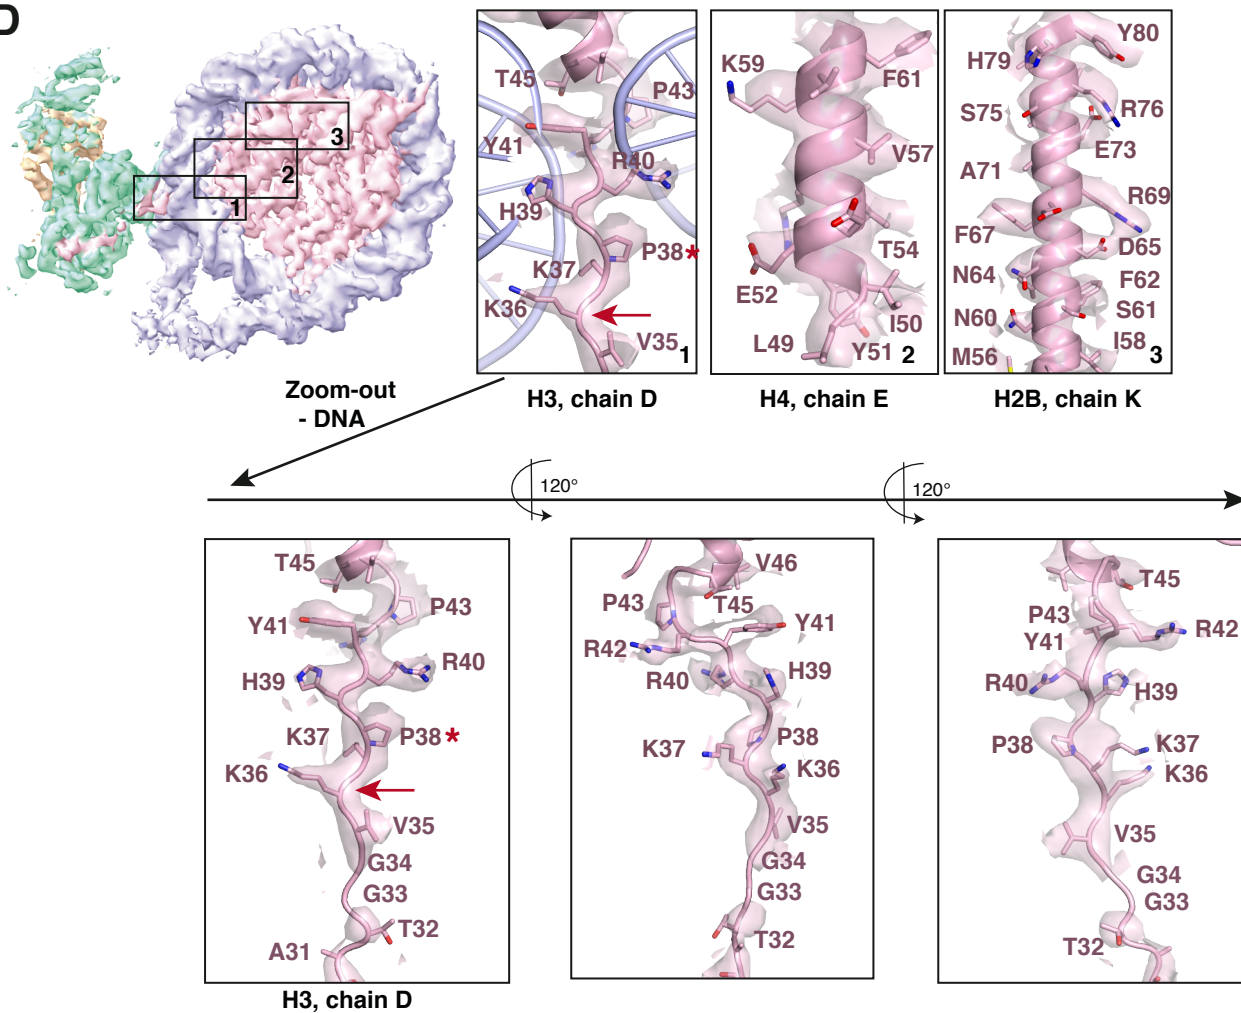

Supplement: supp [file elife_poa_e61964_Figure_1_figure_supplement_3.pdf › elife_poa_e61964_Figure_1_figure_supplement_3.pdf]

# Figure 2-figure supplement 1

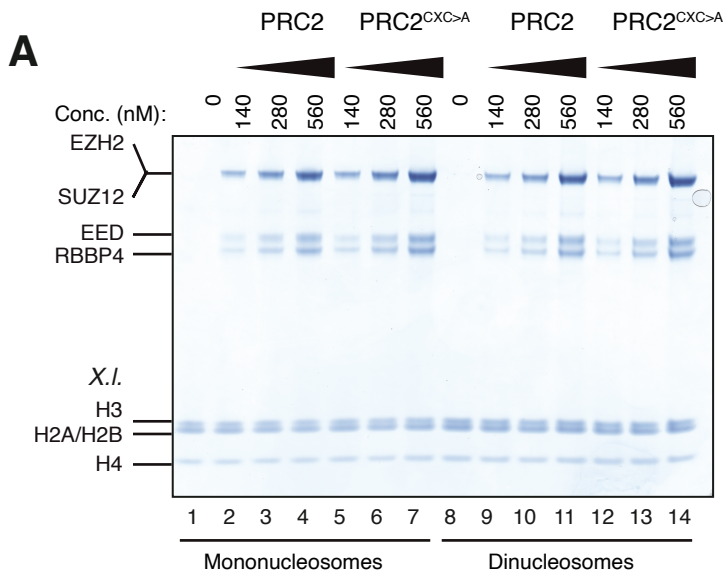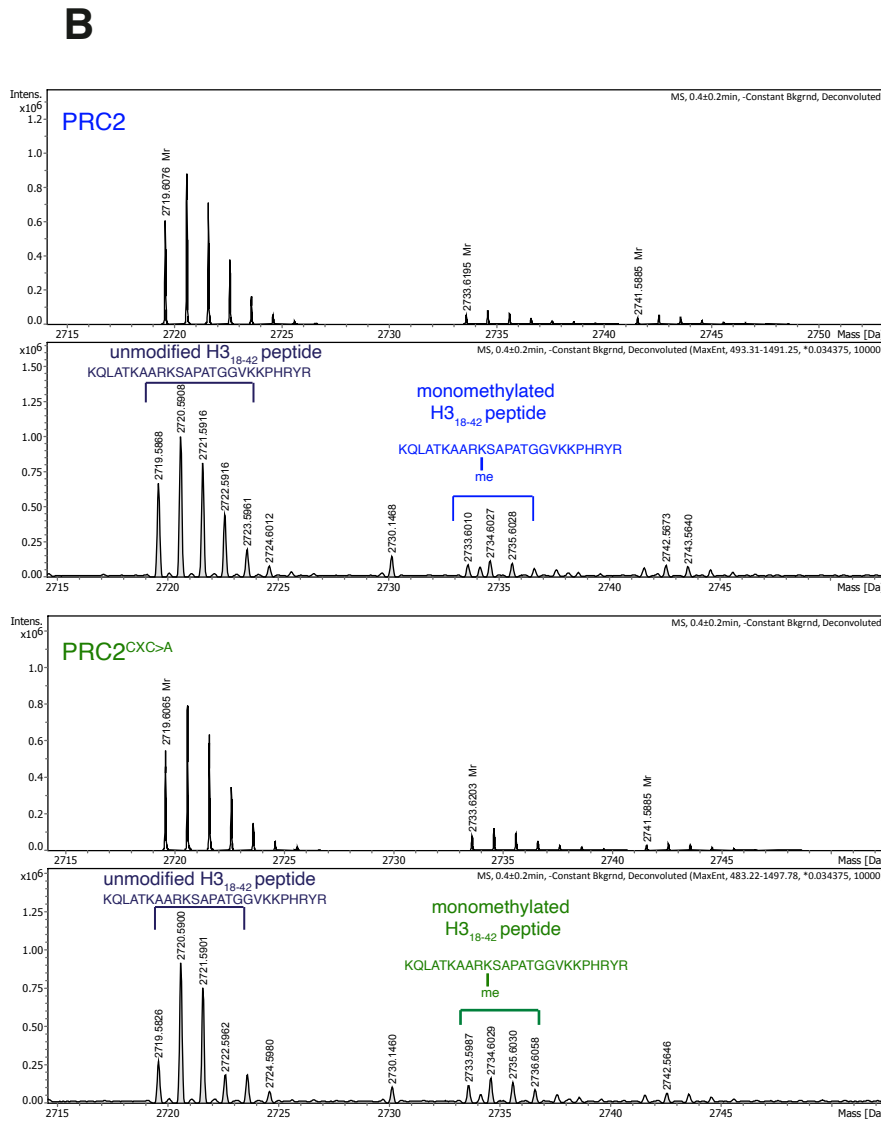

Supplement: supp [file elife_poa_e61964_Figure_2_figure_supplement_1.pdf › elife_poa_e61964_Figure_2_figure_supplement_1.pdf]

# Figure 3-figure supplement 1

**A**

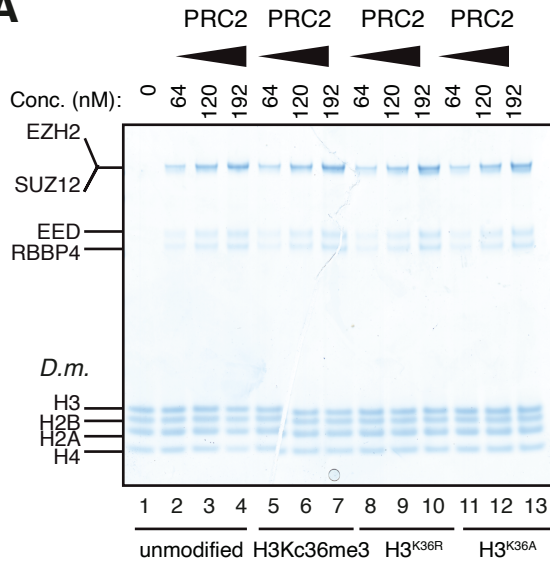

**B**

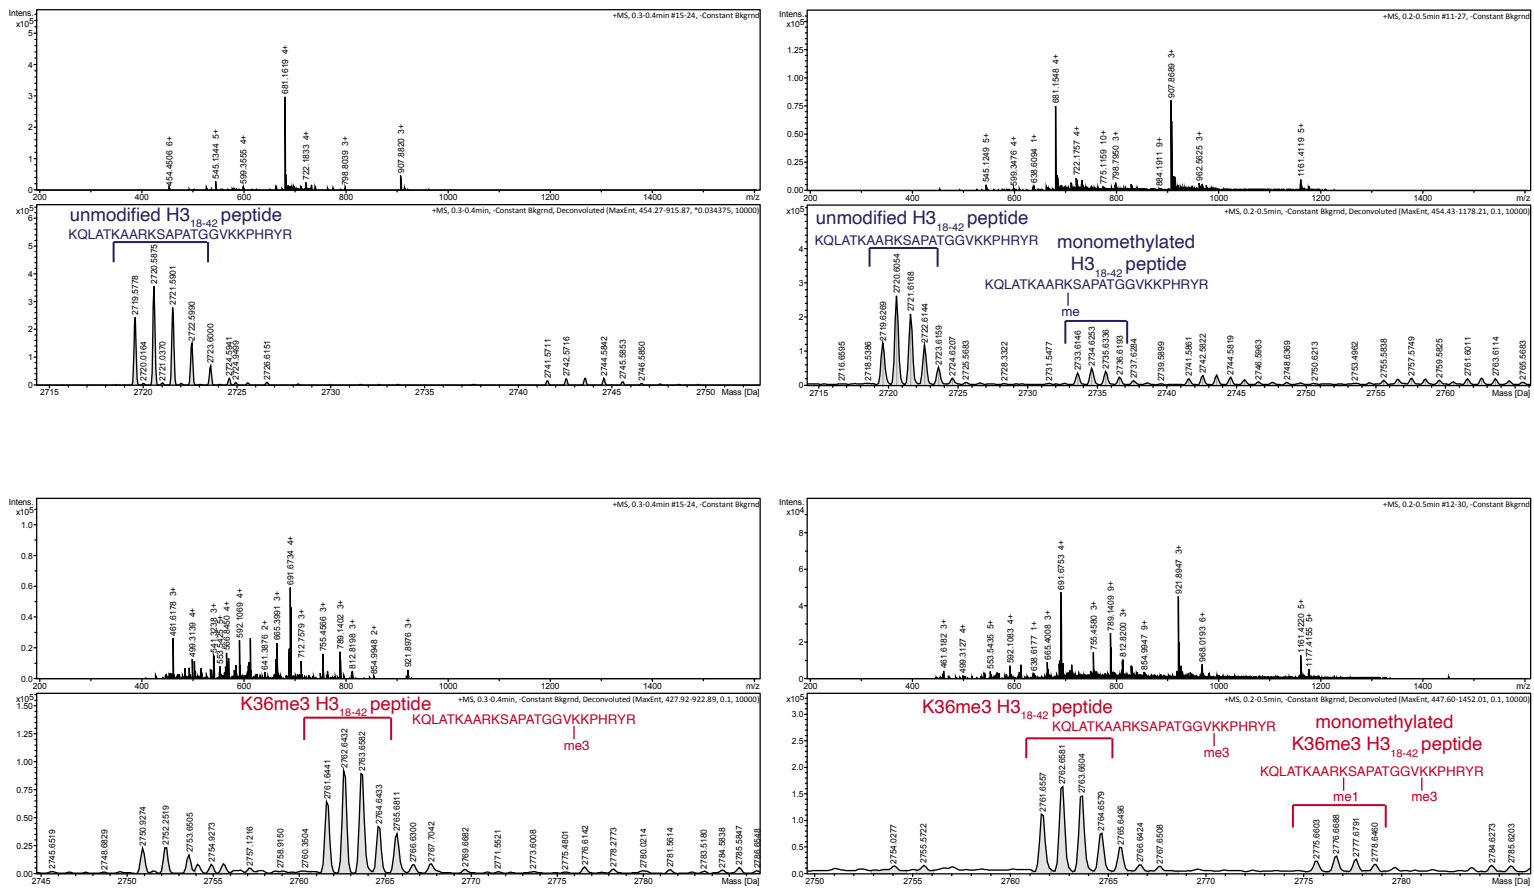

**C**

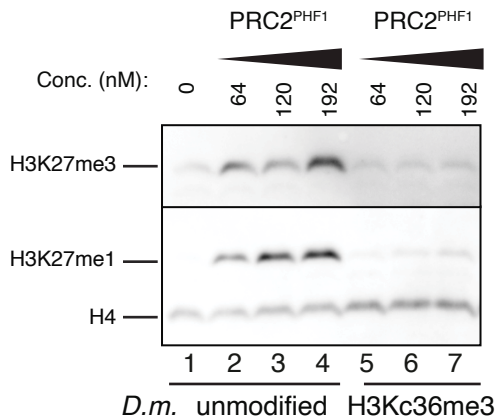

Supplement: supp [file elife_poa_e61964_Figure_3_figure_supplement_1.pdf › elife_poa_e61964_Figure_3_figure_supplement_1.pdf]

# Figure 5-figure supplement 1

**A**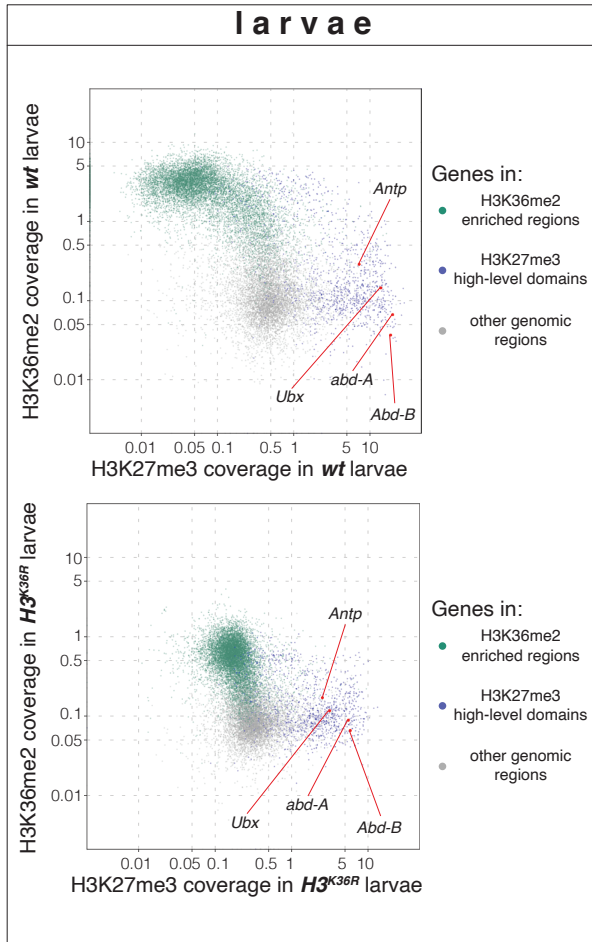**B**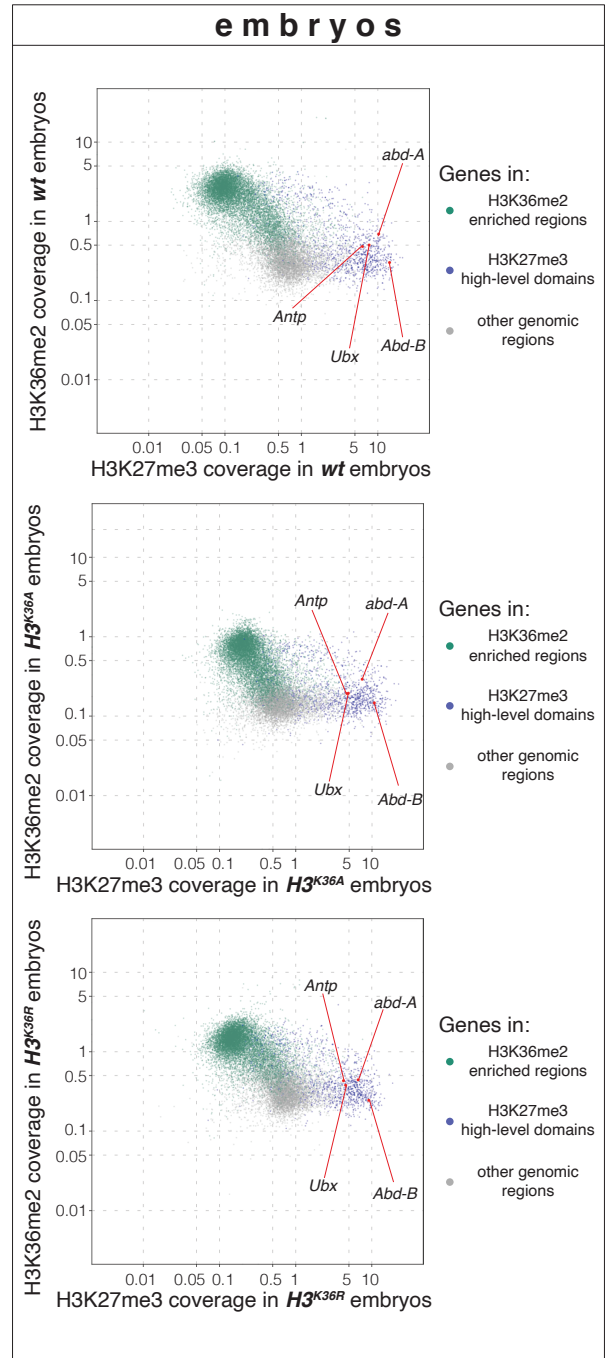

Supplement: supp [file elife_poa_e61964_Figure_5_figure_supplement_1.pdf › elife_poa_e61964_Figure_5_figure_supplement_1.pdf]

Figure 6-figure supplement 1

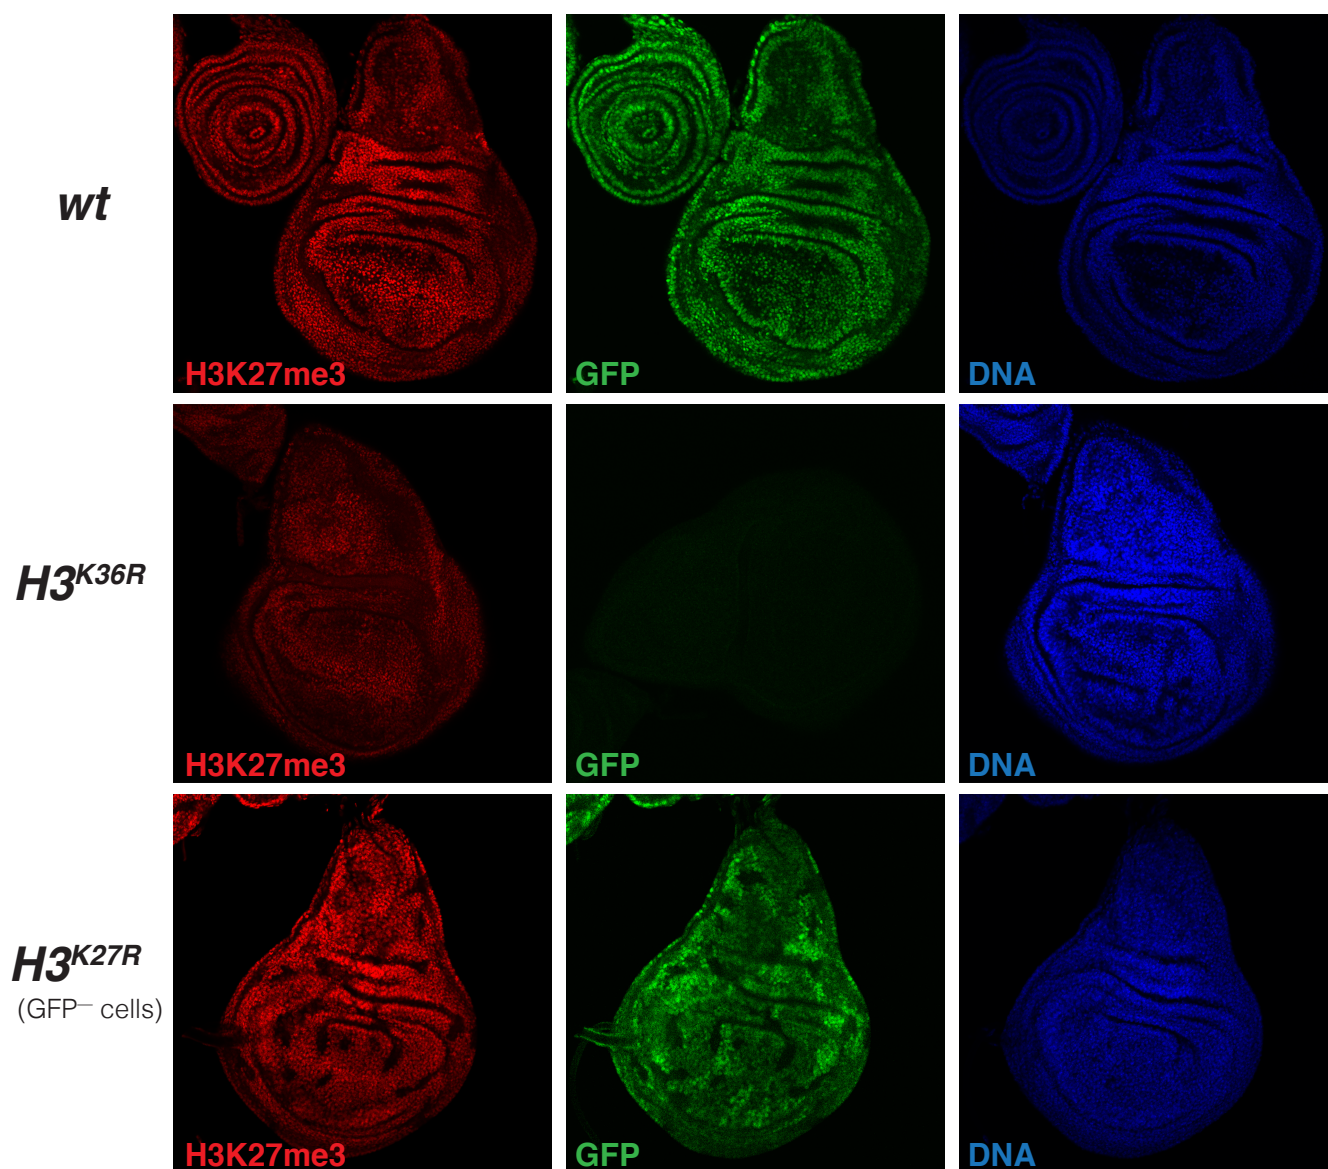

Supplement: supp [file elife_poa_e61964_Figure_6_figure_supplement_1.pdf › elife_poa_e61964_Figure_6_figure_supplement_1.pdf]
